# Supplementary material for: Serum proteomics identify potential biomarkers for nasopharyngeal carcinoma sensitivity to radiotherapy
Source: PubMed Central journal article supplement (PMC6522734; doi:10.1042/bsr20190027), 2019-05-14
Supplement: BSR-2019-0027_suppST1.pdf [file BSR-2019-0027_suppST1.pdf]

**Table 1s** Univariate logistic regression of clinical parameters for overall reduction rate

| <b>Variable</b>   | <b>Beta</b> | <b>SE</b> | <b>Wald<math>\chi^2</math></b> | <b>P</b> | <b>OR</b> | <b>(95%CI)</b> |
|-------------------|-------------|-----------|--------------------------------|----------|-----------|----------------|
| Gender            | -0.508      | 0.649     | 0.615                          | 0.433    | 0.60      | 0.17-2.14      |
| Age               | 0.158       | 0.206     | 0.588                          | 0.443    | 1.17      | 0.78-1.75      |
| Stage             | -0.341      | 0.621     | 0.301                          | 0.583    | 0.71      | 0.21-2.40      |
| differentiation   | -0.059      | 0.806     | 0.005                          | 0.942    | 0.94      | 0.19-4.58      |
| nasopharynx GTVnx | -0.001      | 0.013     | 0.010                          | 0.920    | 1.00      | 0.97-1.02      |
| Lymph GTVnd       | -0.042      | 0.025     | 2.811                          | 0.094    | 0.96      | 0.91-1.01      |
| Red blood cell    | -0.182      | 0.658     | 0.077                          | 0.782    | 0.83      | 0.23-3.03      |
| White blood cell  | 0.514       | 0.656     | 0.612                          | 0.434    | 1.67      | 0.46-6.05      |
| Neutrophil cells  | 0.879       | 0.674     | 1.697                          | 0.193    | 2.41      | 0.64-9.03      |
| lymphocyte        | -1.348      | 0.698     | 3.729                          | 0.054    | 0.26      | 0.07-1.02      |
| Hemoglobin        | -0.619      | 0.665     | 0.867                          | 0.352    | 0.54      | 0.15-1.98      |
| Alpha fetoprotein | -0.434      | 0.661     | 0.430                          | 0.512    | 0.65      | 0.18-2.37      |
| CEA               | 0.000       | 0.657     | 0.000                          | 1.000    | 1.00      | 0.28-3.63      |
| CA125             | 0.000       | 0.657     | 0.000                          | 1.000    | 1.00      | 0.28-3.63      |
| CA242             | -0.251      | 0.660     | 0.145                          | 0.703    | 0.78      | 0.21-2.84      |
| C19F              | 0.434       | 0.661     | 0.430                          | 0.512    | 1.54      | 0.42-5.64      |
| EB virus DNA      | -0.956      | 0.707     | 1.829                          | 0.176    | 0.39      | 0.10-1.54      |
| EAIgA             | -0.693      | 0.949     | 0.534                          | 0.465    | 0.500     | 0.08-3.21      |
| EBVCAIgA          | -0.406      | 0.904     | 0.201                          | 0.654    | 0.67      | 0.11-0.92      |

\* carcinoembryonic antigen, CEA; CA125, Cancer antigen 125; EB, Epstein-Barr virus, EBV
